# Supplementary material for: Anaerobic Digestion of Food Waste, Brewery Waste, and Agricultural Residues in an Off-Grid Continuous Reactor
Source: MDPI journal article supplement (doi:10.3390/su13126509), 2021-06-07
Supplement: s1 [file s1]

**Supplementary Materials:** The following are available online at [www.mdpi.com/xxx/s1](http://www.mdpi.com/xxx/s1), Figure S1: Daily minimum average air temperatures 2016-2018; Figure S2: Digestate temperature sensor and weather station data comparison 2017. Figure S3: Daily biogas production rate (2016-2018).

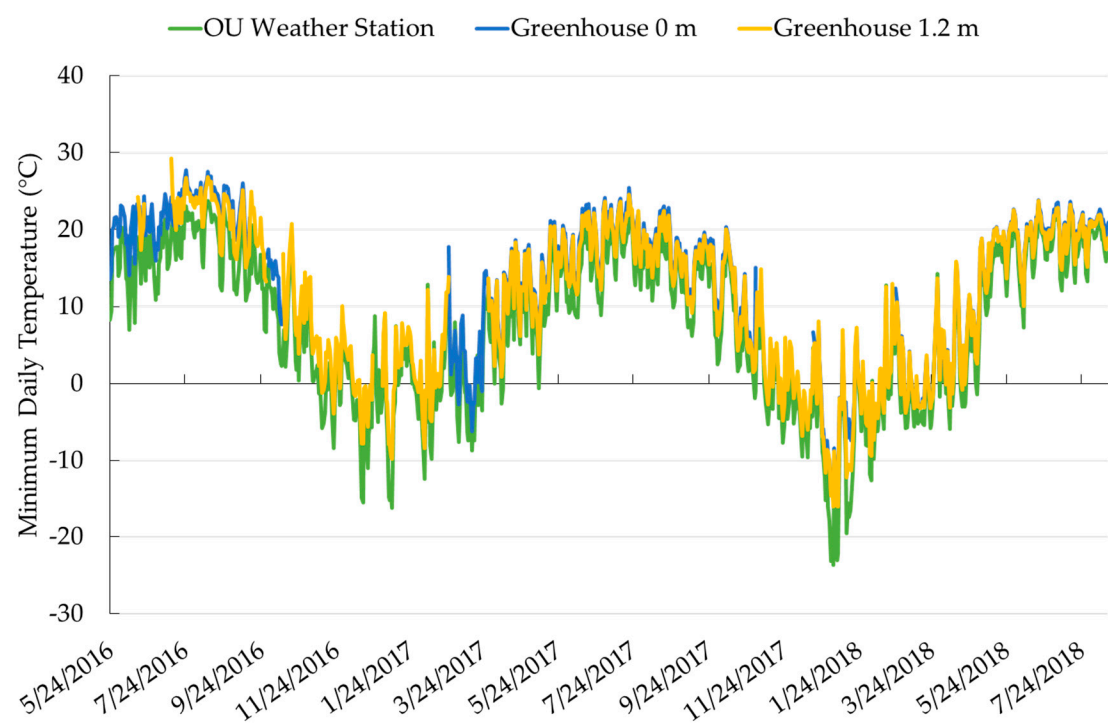

**Figure S1.** A comparison of daily minimum air temperatures broken out by collection location: the Ohio University weather station (blue lines), ground level (0 m) within the greenhouse (orange lines), and chest height (1.2m) within the greenhouse (green lines).

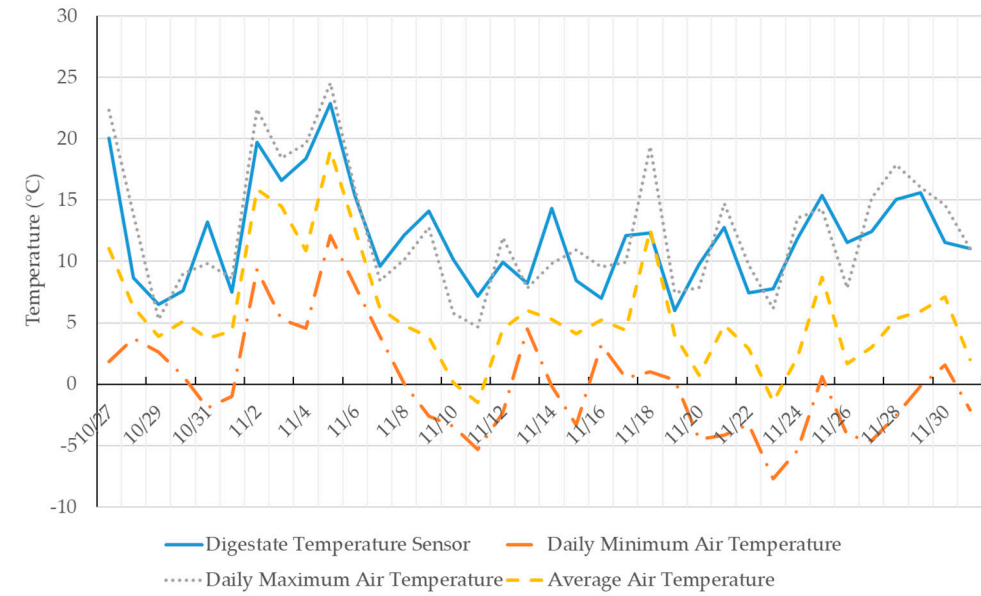

**Figure S2.** A comparison of daily minimum (orange), maximum (grey), and average (yellow) air temperatures with a digestate temperature sensor (blue) installed approximately 30 cm below the liquid line between the outside of the digester and the earthen containment trench (October 27 – December 1, 2017).

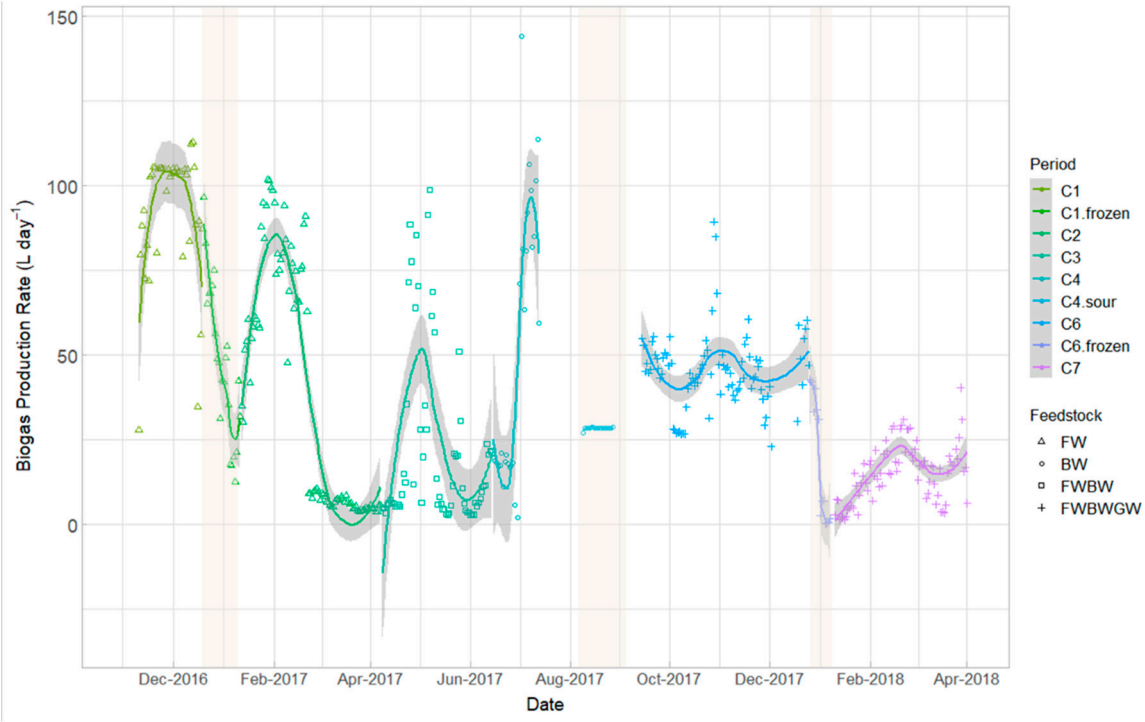

**Figure S3.** Daily biogas production rate calculated from the mass flowmeter. Digestion periods are shown in different colors and have individual loess fit lines with shaded confidence intervals. Symbols represent the feedstock digested. Vertical shaded areas highlight the C1\_frozen, C4\_sour, and C6\_frozen periods when biogas production rates were affected by starvation.
